# Supplementary material for: The global, regional, national burden of laryngeal cancer in young males and its attributable risk factors (1990–2021) and predictions to 2035
Source: Research Square preprint supplement (doi:10.21203/rs.3.rs-6922380/v1), 2025-07-30
Supplement: Supplementary file 1 [file c860829a431a192c7949004e.xlsx]

## Sheet: Sheet1
	Incidence
location	Cases(95%UI)		Rate per 100,000 people(95%UI)		EAPC
	1990	2021	1990	2021	1999-2021
Global	2204.13(2037.79-2411.96)	2399.19(2184.85-2670.80)	0.20(0.18-0.22)	0.16(0.14-0.18)	-0.99(-1.12--0.86)
East Asia	408.74(331.73-494.75)	454.92(349.01-565.56)	0.14(0.11-0.17)	0.18(0.14-0.23)	0.44(0.18-0.71)
Southeast Asia	99.36(85.36-117.71)	167.73(137.29-209.07)	0.10(0.09-0.12)	0.12(0.10-0.15)	0.08(-0.12-0.28)
Oceania	0.49(0.32-0.73)	1.04(0.69-1.59)	0.04(0.02-0.05)	0.04(0.02-0.06)	-0.16(-0.30--0.02)
Central Asia	50.10(46.83-53.50)	31.26(27.23-36.02)	0.35(0.33-0.38)	0.17(0.14-0.19)	-3.37(-3.65--3.10)
Central Europe	131.15(121.69-142.42)	52.69(46.54-58.90)	0.55(0.51-0.60)	0.29(0.26-0.33)	-2.17(-2.54--1.81)
Eastern Europe	260.17(243.13-276.84)	113.23(100.17-128.48)	0.60(0.56-0.64)	0.34(0.30-0.38)	-2.48(-3.15--1.80)
High-income Asia Pacific	37.59(32.37-43.93)	17.48(13.78-22.61)	0.11(0.09-0.13)	0.07(0.05-0.09)	-1.95(-2.22--1.67)
Australasia	3.58(2.88-4.34)	2.32(1.80-3.02)	0.09(0.07-0.11)	0.04(0.03-0.06)	-2.38(-3.10--1.65)
Western Europe	265.80(241.72-292.48)	108.66(96.55-122.42)	0.36(0.33-0.40)	0.16(0.15-0.19)	-2.87(-3.02--2.71)
Southern Latin America	20.97(17.45-25.04)	16.65(13.27-20.62)	0.22(0.18-0.27)	0.13(0.10-0.16)	-1.83(-2.05--1.62)
High-income North America	104.25(99.80-108.54)	71.57(67.51-76.14)	0.18(0.17-0.19)	0.12(0.11-0.12)	-1.95(-2.27--1.63)
Caribbean	12.59(11.05-14.58)	14.27(11.76-16.89)	0.17(0.15-0.20)	0.16(0.13-0.19)	-0.55(-0.79--0.31)
Andean Latin America	6.62(5.44-8.16)	8.68(6.69-11.13)	0.09(0.07-0.11)	0.06(0.05-0.08)	-1.43(-1.75--1.12)
Central Latin America	42.15(39.73-44.91)	40.50(36.10-45.26)	0.13(0.12-0.14)	0.08(0.07-0.09)	-1.75(-1.89--1.61)
Tropical Latin America	72.72(67.24-79.21)	104.50(96.32-112.85)	0.23(0.21-0.25)	0.24(0.22-0.26)	-0.42(-0.66--0.18)
North Africa and Middle East	130.04(108.43-154.20)	255.58(220.90-298.29)	0.19(0.16-0.23)	0.19(0.17-0.23)	0.08(-0.09-0.24)
South Asia	488.20(398.30-613.40)	778.12(644.98-959.96)	0.22(0.18-0.28)	0.19(0.16-0.24)	-0.49(-0.59--0.38)
Central Sub-Saharan Africa	6.42(4.36-9.11)	15.35(10.43-21.73)	0.06(0.04-0.09)	0.06(0.04-0.08)	-0.26(-0.43--0.08)
Eastern Sub-Saharan Africa	26.75(20.72-33.75)	61.21(44.91-82.50)	0.08(0.06-0.10)	0.07(0.05-0.10)	-0.39(-0.47--0.32)
Southern Sub-Saharan Africa	14.91(12.84-17.44)	20.76(16.57-27.53)	0.14(0.12-0.17)	0.12(0.10-0.16)	-0.86(-1.22--0.50)
Western Sub-Saharan Africa	21.54(16.48-26.37)	62.67(41.52-82.81)	0.06(0.05-0.08)	0.07(0.05-0.09)	0.49(0.40-0.59)
High-middle SDI	705.00(659.79-757.82)	497.74(438.61-557.96)	0.31(0.29-0.33)	0.22(0.19-0.24)	-1.62(-1.93--1.30)
High SDI	396.96(375.73-422.99)	232.17(217.12-249.97)	0.22(0.21-0.24)	0.13(0.12-0.14)	-2.12(-2.35--1.90)
Low-middle SDI	384.18(314.93-481.80)	645.69(543.45-787.71)	0.17(0.14-0.21)	0.16(0.13-0.20)	-0.24(-0.32--0.17)
Low SDI	107.23(80.88-139.83)	214.95(172.52-266.89)	0.12(0.09-0.15)	0.10(0.08-0.12)	-0.64(-0.72--0.56)
Middle SDI	607.74(549.67-678.84)	806.73(710.01-899.44)	0.16(0.14-0.18)	0.17(0.15-0.19)	-0.03(-0.12-0.06)

## Sheet: Sheet2
deaths
location	Cases(95%UI)		Rate per 100,000 people(95%UI)		EAPC
	1990	2021	1990	2021	1999-2021
Global	1400.79(1281.24-1551.42)	1256.72(1132.51-1423.84)	0.13(0.12-0.14)	0.08(0.08-0.09)	-1.59(-1.69--1.50)
East Asia	286.88(231.88-346.98)	171.35(132.11-212.75)	0.10(0.08-0.12)	0.07(0.05-0.08)	-1.70(-1.97--1.43)
Southeast Asia	69.26(59.86-80.69)	88.25(72.48-110.01)	0.07(0.06-0.08)	0.06(0.05-0.08)	-0.81(-1.01--0.61)
Oceania	0.35(0.23-0.53)	0.73(0.49-1.11)	0.03(0.02-0.04)	0.03(0.02-0.04)	-0.20(-0.32--0.07)
Central Asia	34.99(32.81-37.35)	19.07(16.55-22.11)	0.25(0.23-0.26)	0.10(0.09-0.12)	-3.84(-4.10--3.57)
Central Europe	79.69(74.75-85.92)	21.69(19.53-23.87)	0.33(0.31-0.36)	0.12(0.11-0.13)	-3.44(-3.84--3.04)
Eastern Europe	158.58(150.22-167.16)	52.90(46.88-60.39)	0.37(0.35-0.39)	0.16(0.14-0.18)	-3.42(-3.97--2.85)
High-income Asia Pacific	10.91(9.04-12.77)	2.15(1.74-2.80)	0.03(0.03-0.04)	0.01(0.01-0.01)	-4.92(-5.13--4.71)
Australasia	1.32(1.11-1.56)	0.50(0.40-0.61)	0.03(0.03-0.04)	0.01(0.01-0.01)	-4.15(-4.69--3.61)
Western Europe	99.21(91.91-107.42)	22.85(20.98-25.13)	0.14(0.13-0.15)	0.03(0.03-0.04)	-4.78(-4.97--4.60)
Southern Latin America	12.64(10.64-14.91)	7.49(6.06-9.29)	0.13(0.11-0.16)	0.06(0.05-0.07)	-2.70(-2.90--2.49)
High-income North America	25.81(25.11-26.62)	13.44(12.79-14.08)	0.05(0.04-0.05)	0.02(0.02-0.02)	-2.80(-3.17--2.44)
Caribbean	7.76(6.82-8.93)	8.11(6.64-9.80)	0.11(0.09-0.12)	0.09(0.07-0.11)	-0.72(-0.89--0.56)
Andean Latin America	5.07(4.22-6.18)	4.91(3.76-6.40)	0.07(0.06-0.08)	0.04(0.03-0.05)	-2.42(-2.70--2.13)
Central Latin America	29.90(28.28-31.59)	22.50(20.23-25.21)	0.09(0.09-0.10)	0.05(0.04-0.05)	-2.52(-2.64--2.39)
Tropical Latin America	50.74(47.22-54.95)	58.99(54.67-63.64)	0.16(0.15-0.17)	0.13(0.12-0.14)	-1.06(-1.28--0.83)
North Africa and Middle East	90.25(75.36-108.31)	119.40(103.13-139.80)	0.13(0.11-0.16)	0.09(0.08-0.11)	-1.22(-1.35--1.10)
South Asia	382.25(310.57-480.91)	523.24(433.76-640.04)	0.17(0.14-0.22)	0.13(0.11-0.16)	-0.98(-1.11--0.84)
Central Sub-Saharan Africa	5.28(3.62-7.58)	11.81(8.07-16.97)	0.05(0.04-0.07)	0.04(0.03-0.06)	-0.46(-0.60--0.31)
Eastern Sub-Saharan Africa	21.67(16.74-27.54)	46.12(33.89-62.17)	0.06(0.05-0.08)	0.05(0.04-0.07)	-0.61(-0.67--0.54)
Southern Sub-Saharan Africa	10.82(9.30-12.63)	14.39(11.38-19.10)	0.10(0.09-0.12)	0.08(0.07-0.11)	-0.99(-1.37--0.60)
Western Sub-Saharan Africa	17.40(13.35-21.28)	46.81(31.20-61.44)	0.05(0.04-0.06)	0.05(0.03-0.07)	0.24(0.15-0.33)
High-middle SDI	426.36(396.98-459.53)	192.69(173.10-212.86)	0.19(0.17-0.20)	0.08(0.08-0.09)	-3.10(-3.37--2.82)
High SDI	148.60(141.26-156.64)	54.68(50.96-59.02)	0.08(0.08-0.09)	0.03(0.03-0.03)	-3.56(-3.89--3.23)
Low-middle SDI	301.03(246.60-377.49)	439.84(367.97-537.33)	0.13(0.11-0.17)	0.11(0.09-0.13)	-0.68(-0.77--0.59)
Low SDI	86.50(64.71-112.03)	159.18(127.23-197.69)	0.10(0.07-0.12)	0.07(0.06-0.09)	-0.92(-1.02--0.81)
Middle SDI	436.51(396.73-487.90)	409.40(363.96-454.77)	0.11(0.10-0.13)	0.09(0.08-0.10)	-1.15(-1.25--1.06)

## Sheet: Sheet3
DALYs
location	Cases(95%UI)		Rate per 100,000 people(95%UI)		EAPC
	1990	2021	1990	2021	1999-2021
Global	79152.97(72370.74-87638.79)	71192.43(64067.23-80489.33)	7.14(6.53-7.91)	4.72(4.24-5.33)	-1.58(-1.67--1.48)
East Asia	16426.06(13270.84-19857.88)	9844.54(7614.56-12245.63)	5.65(4.56-6.83)	3.93(3.04-4.88)	-1.67(-1.93--1.40)
Southeast Asia	3985.82(3443.32-4604.75)	5056.19(4162.73-6308.63)	4.11(3.55-4.75)	3.59(2.96-4.48)	-0.83(-1.02--0.63)
Oceania	19.46(12.60-29.49)	40.69(27.07-61.03)	1.43(0.93-2.17)	1.42(0.94-2.12)	-0.20(-0.32--0.07)
Central Asia	2001.05(1874.67-2135.58)	1083.74(941.60-1257.86)	14.13(13.23-15.08)	5.73(4.98-6.65)	-3.84(-4.10--3.58)
Central Europe	4382.27(4106.88-4723.81)	1210.89(1093.21-1334.78)	18.42(17.26-19.85)	6.74(6.08-7.43)	-3.38(-3.77--2.99)
Eastern Europe	8744.13(8273.80-9215.09)	2920.94(2587.02-3329.31)	20.26(19.17-21.35)	8.72(7.72-9.94)	-3.38(-3.93--2.84)
High-income Asia Pacific	643.95(535.14-757.33)	132.27(107.26-171.94)	1.88(1.56-2.21)	0.51(0.41-0.66)	-4.77(-4.97--4.57)
Australasia	75.54(64.01-89.23)	29.07(23.60-35.40)	1.85(1.57-2.18)	0.55(0.45-0.67)	-4.10(-4.63--3.56)
Western Europe	5612.56(5209.20-6056.44)	1325.03(1213.95-1463.82)	7.68(7.13-8.29)	2.01(1.84-2.22)	-4.70(-4.88--4.52)
Southern Latin America	708.68(597.31-833.91)	427.21(346.73-527.60)	7.51(6.33-8.83)	3.31(2.69-4.09)	-2.64(-2.84--2.44)
High-income North America	1481.69(1435.75-1531.58)	790.80(753.25-829.42)	2.60(2.52-2.69)	1.27(1.21-1.33)	-2.70(-3.05--2.34)
Caribbean	448.99(396.08-513.45)	465.15(382.58-560.67)	6.17(5.44-7.06)	5.12(4.21-6.17)	-0.74(-0.90--0.59)
Andean Latin America	300.49(250.47-367.48)	291.07(224.15-378.10)	3.96(3.30-4.85)	2.13(1.64-2.77)	-2.40(-2.69--2.12)
Central Latin America	1741.85(1649.19-1838.96)	1307.66(1174.69-1463.11)	5.25(4.97-5.55)	2.63(2.37-2.95)	-2.50(-2.63--2.37)
Tropical Latin America	2861.20(2668.02-3094.23)	3339.32(3100.80-3595.25)	9.05(8.44-9.78)	7.60(7.06-8.19)	-1.02(-1.24--0.79)
North Africa and Middle East	5207.00(4356.24-6220.80)	6869.24(5929.85-8063.97)	7.60(6.36-9.08)	5.19(4.48-6.09)	-1.23(-1.35--1.11)
South Asia	21389.76(17393.84-26822.95)	29298.83(24278.40-35944.52)	9.60(7.81-12.04)	7.26(6.02-8.91)	-0.98(-1.11--0.85)
Central Sub-Saharan Africa	299.84(207.19-427.42)	671.83(456.91-971.74)	2.90(2.01-4.14)	2.49(1.69-3.60)	-0.45(-0.60--0.31)
Eastern Sub-Saharan Africa	1218.51(944.52-1543.90)	2598.64(1911.28-3499.88)	3.57(2.77-4.53)	3.04(2.24-4.09)	-0.61(-0.67--0.55)
Southern Sub-Saharan Africa	615.56(528.66-721.88)	817.45(649.11-1081.27)	5.89(5.06-6.91)	4.82(3.83-6.38)	-0.99(-1.38--0.61)
Western Sub-Saharan Africa	988.57(760.46-1207.63)	2671.90(1786.62-3510.20)	2.87(2.21-3.50)	2.94(1.96-3.86)	0.26(0.17-0.35)
High-middle SDI	23949.77(22336.50-25844.18)	10929.32(9852.54-12120.44)	10.41(9.71-11.23)	4.77(4.30-5.30)	-3.05(-3.32--2.78)
High SDI	8390.60(7985.97-8848.88)	3163.35(2951.63-3404.83)	4.75(4.52-5.01)	1.73(1.62-1.86)	-3.46(-3.79--3.14)
Low-middle SDI	16935.21(13921.76-21142.04)	24767.24(20700.10-30181.30)	7.42(6.10-9.27)	6.14(5.13-7.48)	-0.68(-0.76--0.59)
Low SDI	4862.42(3642.60-6271.90)	9005.60(7213.66-11180.93)	5.35(4.01-6.90)	4.06(3.25-5.04)	-0.91(-1.02--0.81)
Middle SDI	24914.26(22621.17-27932.65)	23274.77(20629.74-25852.52)	6.53(5.93-7.32)	4.93(4.37-5.48)	-1.16(-1.25--1.07)
